# Supplementary material
Source: PubMed Central journal article supplement (PMC1630416)

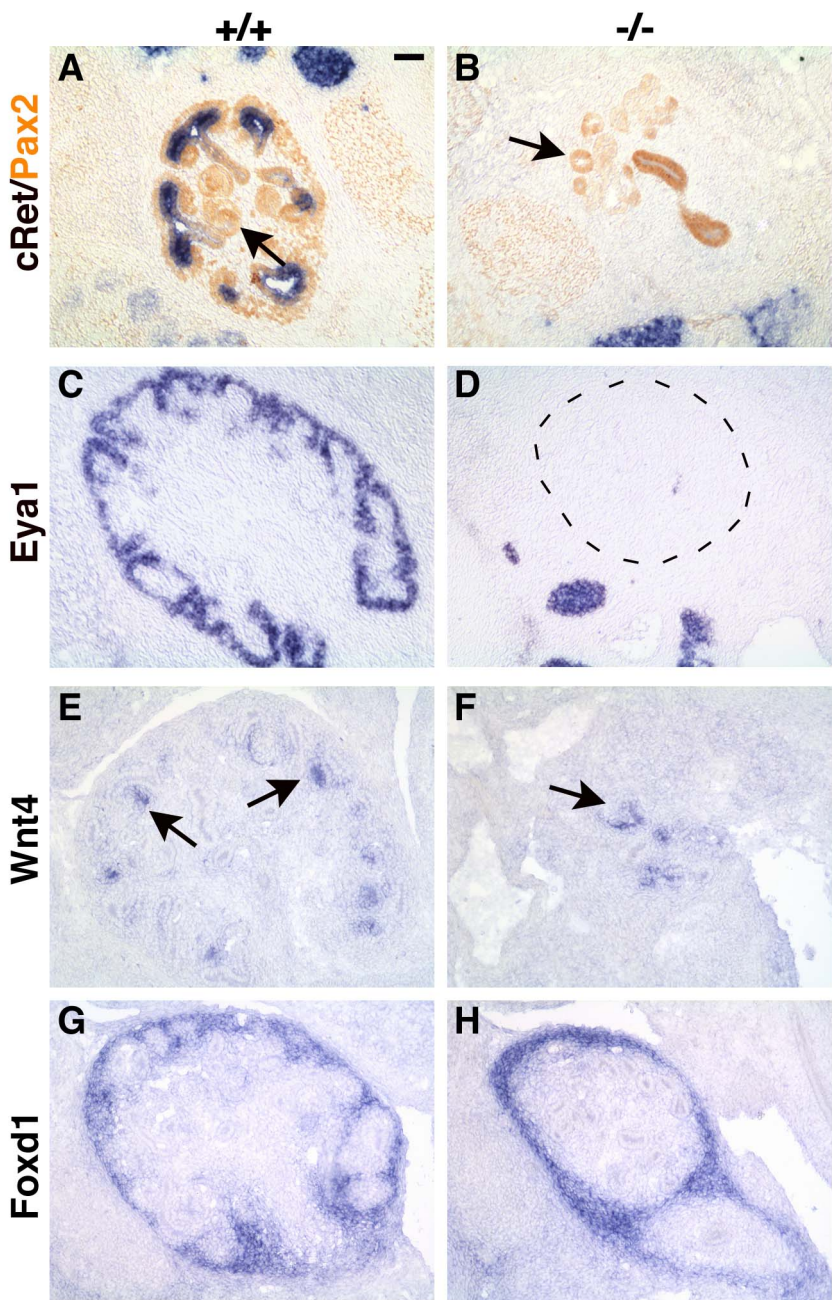

Supplement: 7601381s7.pdf [file 7601381s7.pdf]
